# Supplementary material for: Genome-wide and parental allele-specific analysis of CTCF and cohesin DNA binding in mouse brain reveals a tissue-specific binding pattern and an association with imprinted differentially methylated regions
Source: HighWire-hosted journal article supplement (doi:10.1101/gr.150136.112), 2013-06-26
Supplement: Supplemental_Figures_Tables.pdf [file Supplemental_Figures_Tables.pdf]

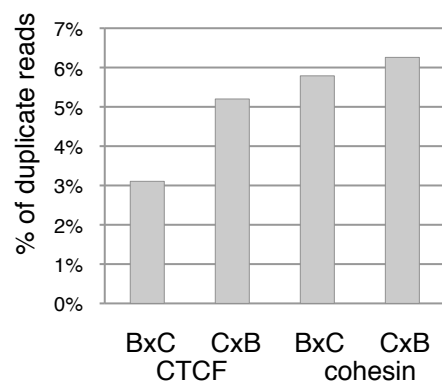

Figure S1: Read duplicates are shown for each ChIP-seq experiment. Clonal reads were removed prior to further analysis but overall these were a small proportion ( $<7\%$ ) of the total number of reads, indicative of the robustness of the ChIP-seq data.

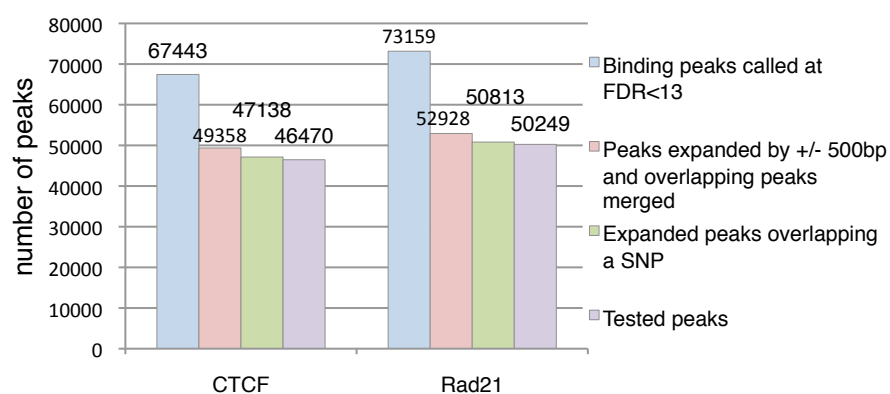

Figure S2: CTCF and cohesin binding regions were identified using Useq and resulted in the identification of 67,443 CTCF and 73,159 (Rad21) cohesin binding at an FDR < 13 (blue bars). To test mono-allelic binding CTCF and Rad21 binding regions were expanded by 500 bp and overlapping regions merged (red bars). Merged regions overlapping a SNP and thus where it is theoretically possible to test mono-allelic binding are shown (green bars). Where two or more reads with good enough quality overlapped the SNP a binomial test was conducted, and mono-allelic expression was assessed (purple bars).

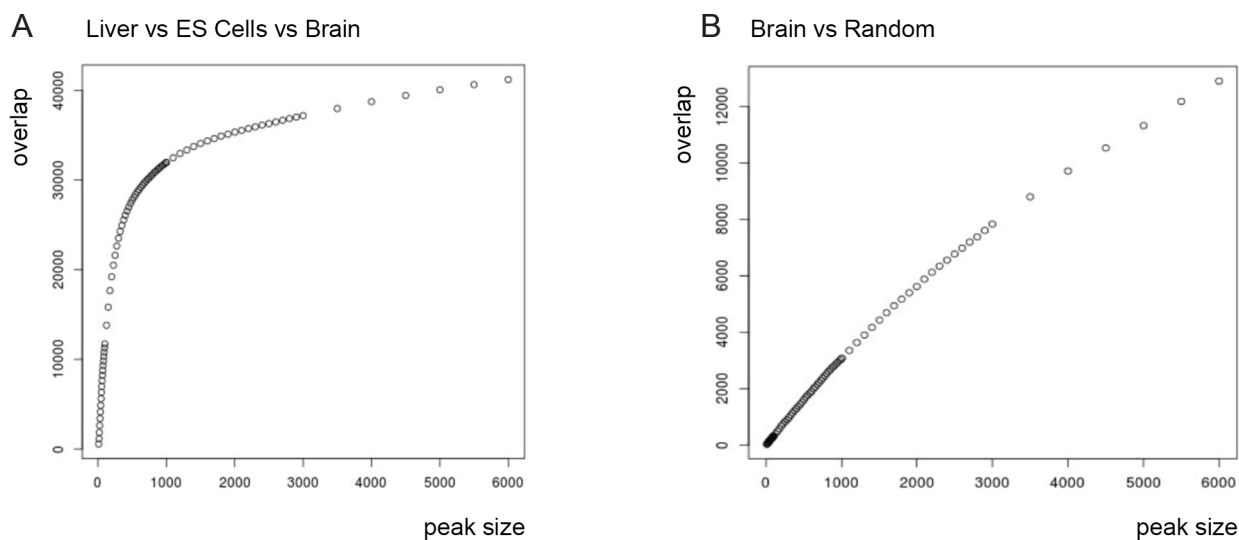

Figure S3: To identify the correct size of peak to make appropriate comparisons between datasets, the optimum size for the binding peak was determined by iterative comparison of overlaps in brain, liver (Schmidt et al. 2010) and ES cell (Chen et al. 2008) datasets: Graph (A) indicates that above a peak size of 1kb, any increase in overlap between the dataset is due to noise. Graph (B) is the control for (A) whereby a randomly created dataset is plotted against brain CTCF ChIP-seq data. Overlap of CTCF binding between tissues:

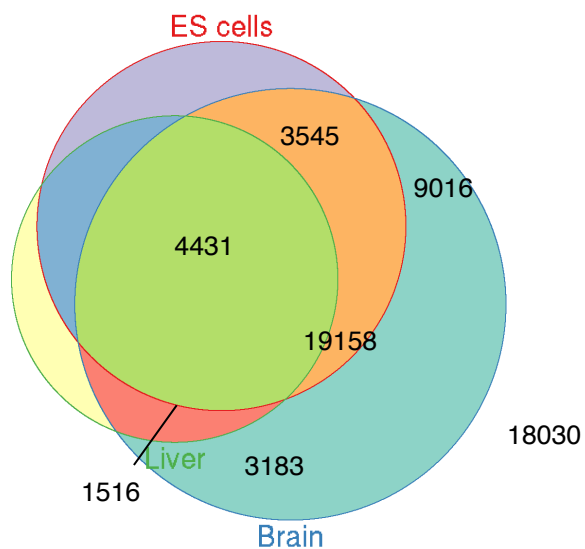

Figure S4: Overlap of CTCF binding between ES cells, liver and brain was repeated using CTCF ChIP-seq data from Shen et al (2012). CTCF binding for brain from Shen was not used due to the paucity of data available. Overlap of binding confirms the result seen in the original comparison indicating significant overlap of binding between all three tissues (Fig. 4A).

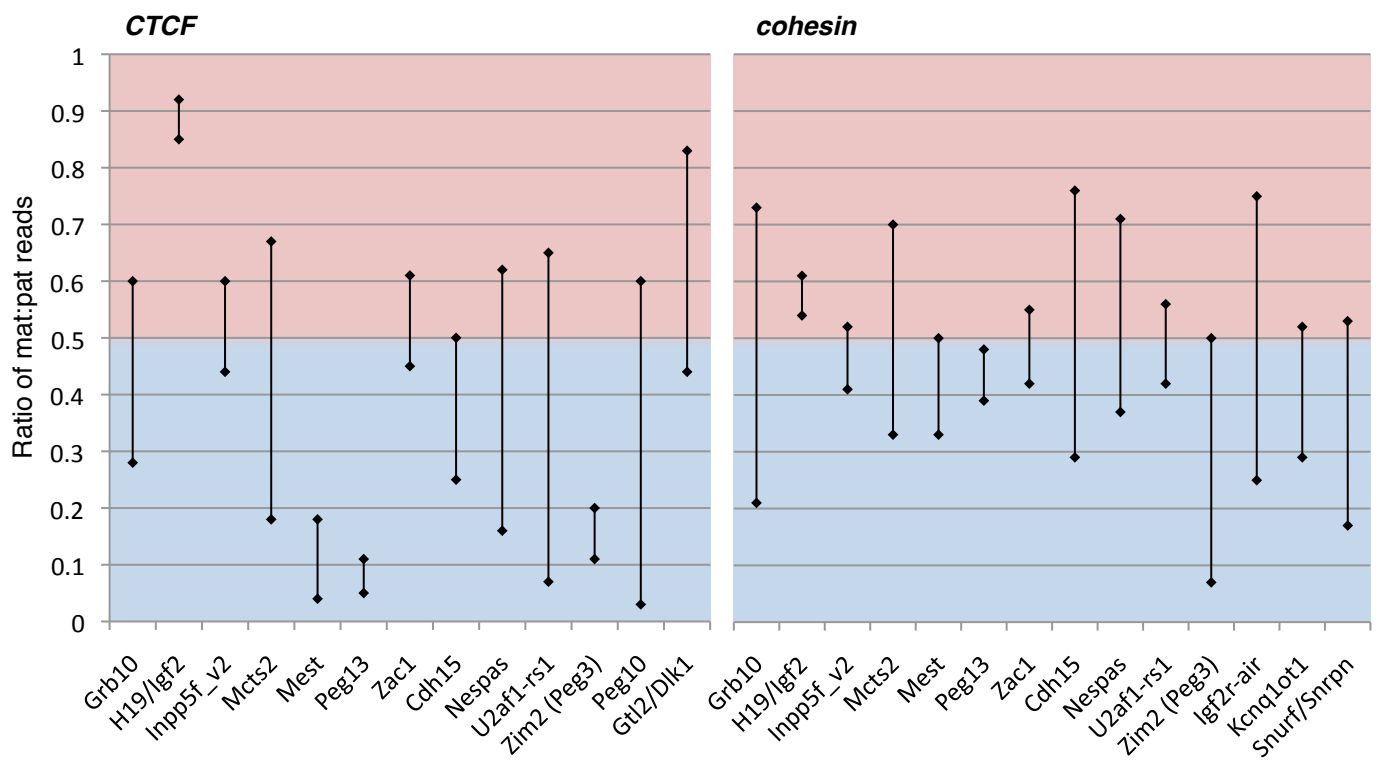

Figure S5: Plot of 95% confidence intervals for ratio of maternal:paternal reads of CTCF (left) and cohesin (right). These plots illustrate that the bias towards maternal or paternal binding is greater for CTCF than for cohesin. CTCF binding is suggestive of binding towards the unmethylated allele for all regions examined except for *Inpp5f\_v2* and *Zac1*, where binding is bi-allelic. Regions where there was no SNP between BL6 and cast could not be assessed and are not shown.

Rtdr/Gnaz - chr10:74,392,049-74,499,194

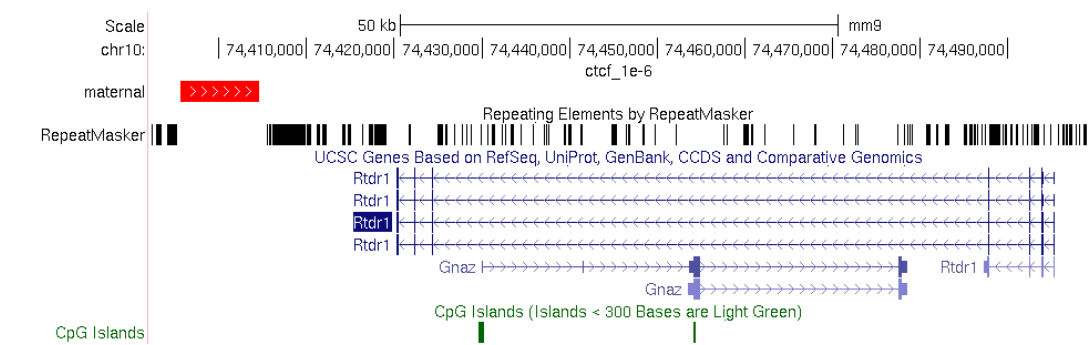

Gata5 - chr2:180,052,061-180,139,995

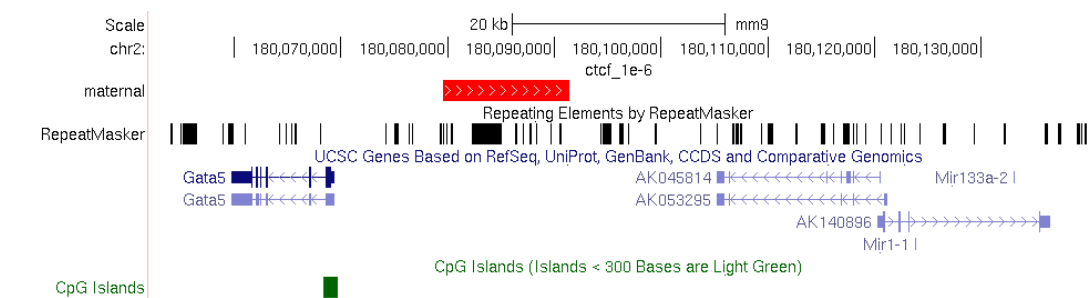

Entpd4/Loxl2 - chr14:69,884,977-70,163,630

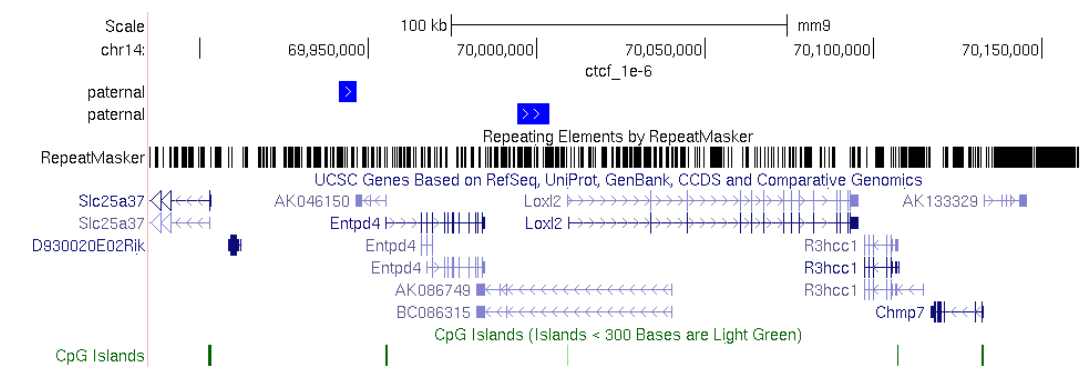

Tbc1d30 - chr10:120,689,034-120,760,088

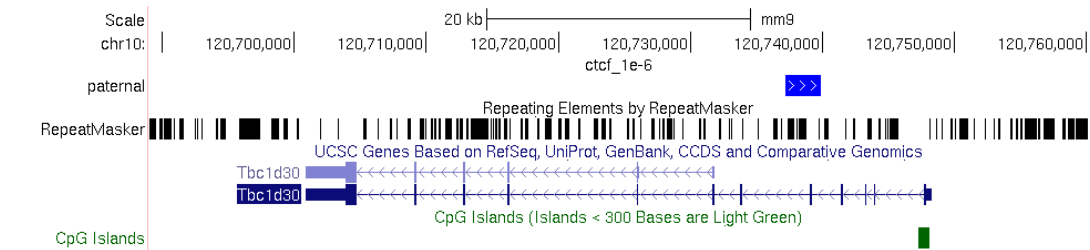

*Slc44a3* - chr3:121,138,949-121,281,439

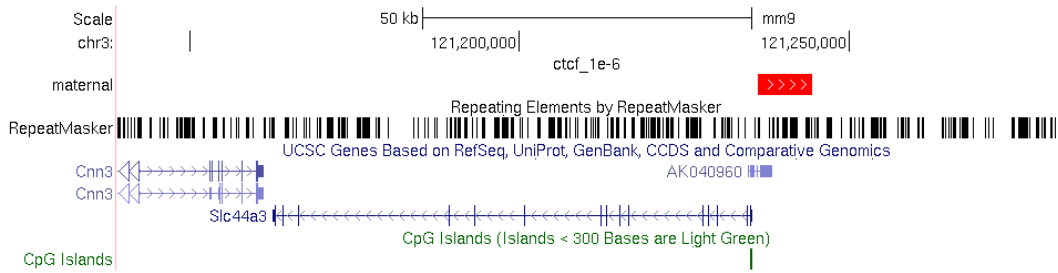

*Trio* - chr15:27,646,061-27,968,903

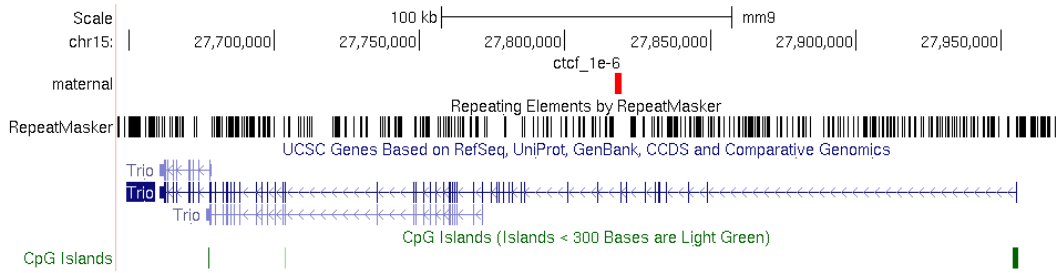

*Mrs2* - chr13:24,988,205-25,161,693

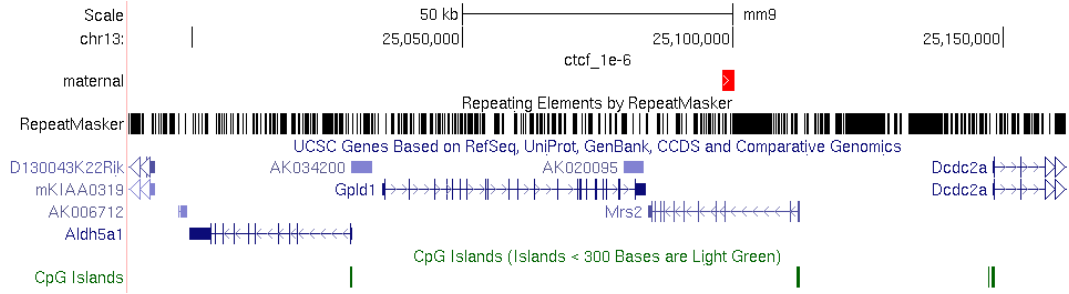

*Snca* - chr6:60,584,662-60,814,390

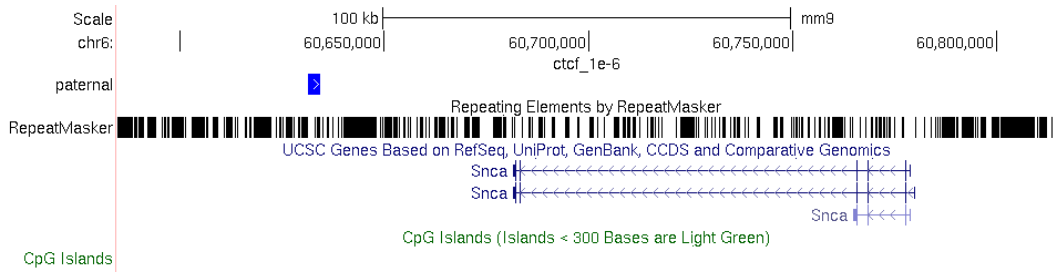

Figure S6: Regions of genomewide significant parent-of-origin specific CTCF binding displayed in UCSC genome browser for each genomewide significant region not associated with a known imprinted gene. Paternal binding is indicated as a blue box maternal binding as a red box.

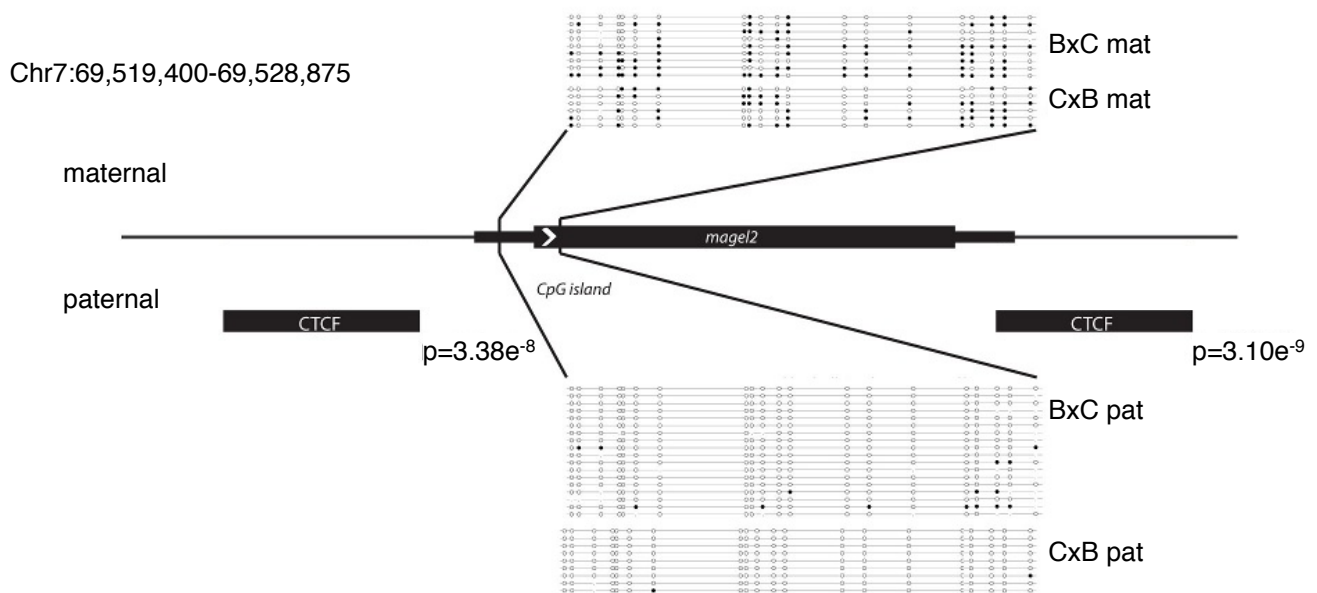

Figure S7: Methylation at the *Magel2* promoter. Due to the presence of multiple sites of paternal CTCF binding at the *Magel2/Peg13* locus and in particular two in close proximity to *Magel2*, the promoter CpG Island was tested for parent of origin specific methylation. Using locus specific bisulphite analysis in 3 week mouse brain a maternally methylated DMR was identified. Circles represent CpG dinucleotides, filled circles indicate methylated cytosine and white circles unmethylated cytosine residues. CTCF binding sites are shown.



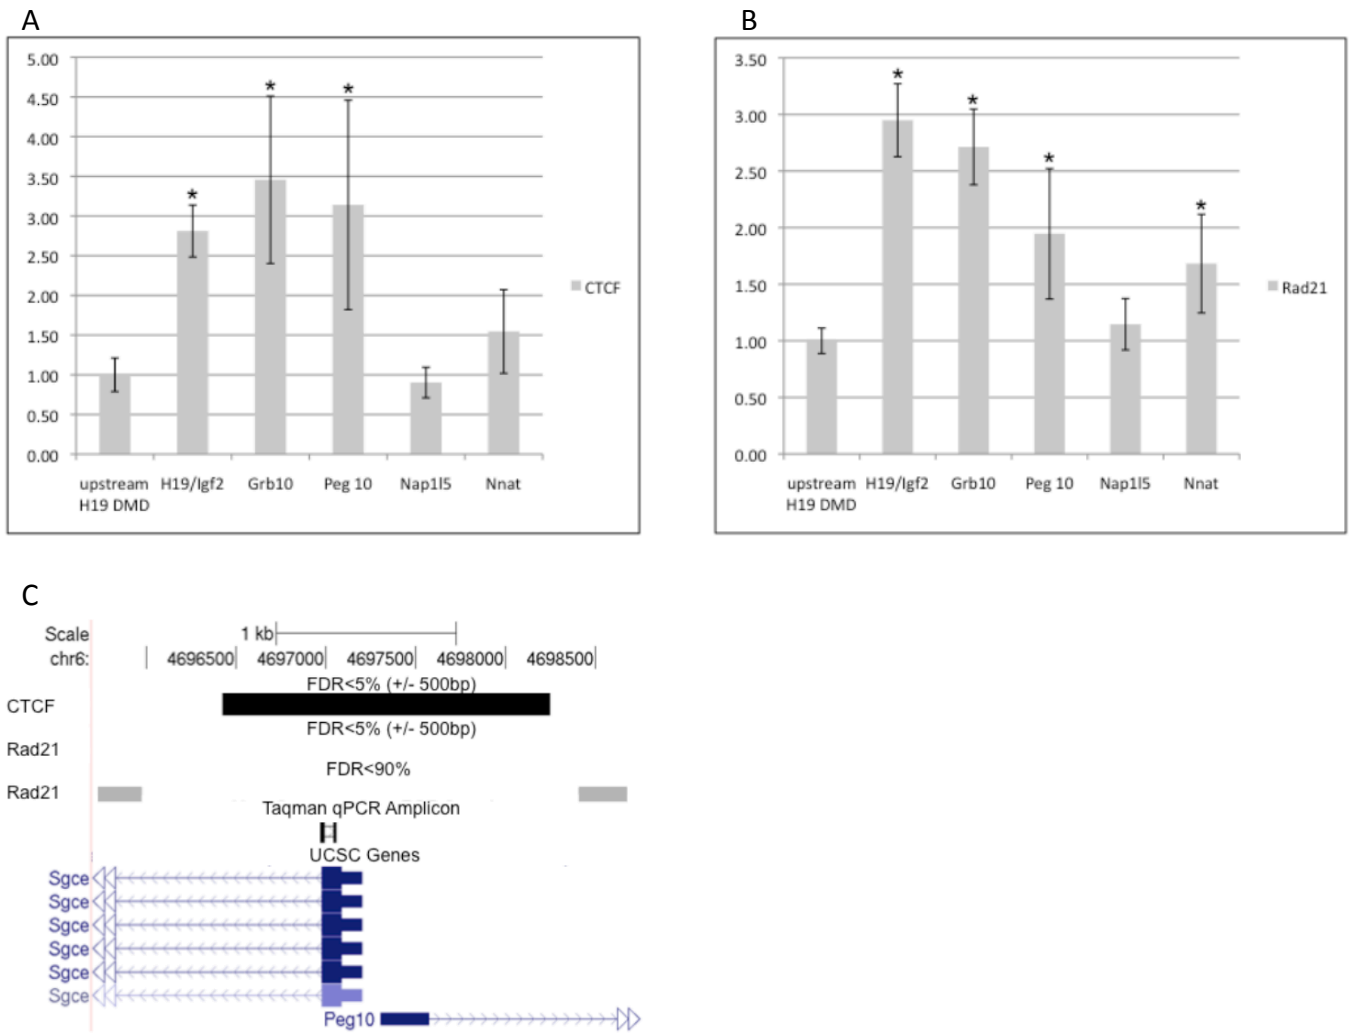

Figure S8: Validation of ChIP-seq binding. (A and B) Quantitative PCR analysis showing average CTCF (A) and cohesin (Rad21) (B) enrichment with standard deviations at five gDMRs. Regions that differ from the negative control upstream *H19* gDMR (DMD) with a  $p < 0.05$  are denoted with an asterisk indicating that these regions show statistically significant levels of CTCF or cohesin binding above the level of the negative control. C. UCSC screenshot showing CTCF binding peak called at <5% FDR (black) and cohesin binding peaks called at <90% FDR (grey). The *Peg10* TaqMan™ qPCR location is indicated.

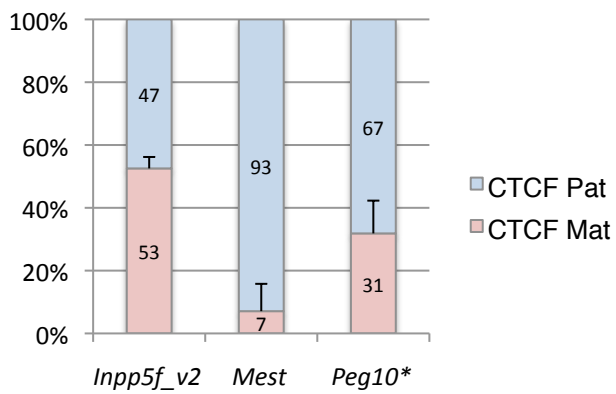

Figure S9: Validation of Table 1 using pyrosequencing to test allelic bias reveals results concordant with those seen using ChIP-seq. *Inpp5f\_V2* shows approximately equal enrichment of maternal and paternal DNA indicative of bi-allelic binding, *Mest* shows a significant bias towards binding on the paternal allele and *Peg10* is suggestive of binding bias towards the paternal allele. \* denotes 3 biological replicates, other samples were 4 biological replicates. Error bars represent the standard deviation of the percent maternal enrichment values.

|       | Binding peaks called at FDR<13 | Peaks expanded by +/- 500bp and overlapping peaks merged | Expanded peaks overlapping a SNP | Tested peaks |
|-------|--------------------------------|----------------------------------------------------------|----------------------------------|--------------|
| CTCF  | 67443                          | 49358                                                    | 47138                            | 46470        |
| Rad21 | 73159                          | 52928                                                    | 50813                            | 50249        |

Table S1: Number of peaks called by Useq with a statistical threshold of FDR < 13. To test for mono-allelic binding, peaks were expanded by 500 bp either side and overlapping peaks were merged. Peaks which contained a SNP between B16 and cast are shown and where two or more reads overlapped a SNP a binomial test was performed to test for mono-allelic binding resulting in 46,470 regions tested for CTCF and 50,249 for Rad21.

| gDMR name                                  | Methylated Allele | CTCF Binding | Mat Reads | Pat reads | 95% CI    | Cohesin Binding | Mat Reads | Pat reads | 95% CI    |
|--------------------------------------------|-------------------|--------------|-----------|-----------|-----------|-----------------|-----------|-----------|-----------|
| CTCF and cohesin precisely colocalized     |                   |              |           |           |           |                 |           |           |           |
| Grb10                                      | Maternal          | Yes          | 2         | 7         | 0.28-0.60 | Yes             | 7         | 8         | 0.21-0.73 |
| H19/Igf2                                   | Paternal          | Yes          | 310       | 38        | 0.85-0.92 | Yes             | 407       | 303       | 0.54-0.61 |
| Inpp5f v2                                  | Maternal          | Yes          | 85        | 78        | 0.44-0.60 | Yes             | 150       | 173       | 0.41-0.52 |
| Mcts2                                      | Maternal          | Yes          | 7         | 10        | 0.18-0.67 | Yes             | 16        | 15        | 0.33-0.70 |
| Mest                                       | Maternal          | Yes          | 8         | 75        | 0.04-0.18 | Yes             | 57        | 82        | 0.33-0.50 |
| Nnat                                       | Maternal          | Yes          | No SNP    |           |           | Yes             | No SNP    |           |           |
| Peg13                                      | Maternal          | Yes          | 22        | 278       | 0.05-0.11 | Yes             | 211       | 273       | 0.39-0.48 |
| Zac1                                       | Maternal          | Yes          | 85        | 75        | 0.45-0.61 | Yes             | 127       | 136       | 0.42-0.55 |
| CTCF and cohesin not precisely colocalized |                   |              |           |           |           |                 |           |           |           |
| Cdh15                                      | Maternal          | Yes          | 24        | 41        | 0.25-0.50 | Yes             | 10        | 9         | 0.29-0.76 |
| Nespas                                     | Maternal          | Yes          | 7         | 12        | 0.16-0.62 | Yes             | 19        | 16        | 0.37-0.71 |
| U2af1-rs1                                  | Maternal          | Yes          | 3         | 7         | 0.07-0.65 | Yes             | 108       | 113       | 0.42-0.56 |
| Zim2 (Peg3)                                | Maternal          | Yes          | 39        | 215       | 0.11-0.20 | Yes             | 4         | 13        | 0.07-0.50 |
| CTCF binding only                          |                   |              |           |           |           |                 |           |           |           |
| Peg10                                      | Maternal          | Yes          | 2         | 7         | 0.03-0.60 | No              |           |           |           |
| Gtl2/Dlk1                                  | Paternal          | Yes          | 17        | 9         | 0.44-0.83 | No              |           |           |           |
| IMPACT                                     | Maternal          | Yes          | No SNP    |           |           | No              |           |           |           |
| Cohesin binding only                       |                   |              |           |           |           |                 |           |           |           |
| Igf2r-air                                  | Maternal          | No           |           |           |           | Yes             | 8         | 8         | 0.25-0.75 |
| Gnas-exon1A                                | Maternal          | No           |           |           |           | Yes             | No SNP    |           |           |
| Kcnq1ot1                                   | Maternal          | No           |           |           |           | Yes             | 30        | 43        | 0.29-0.52 |
| Snurf/Snrpn                                | Maternal          | No           |           |           |           | Yes             | 10        | 20        | 0.17-0.53 |

Table S2: Shows the number of mapped maternal and paternal reads at each regions and the confidence intervals, which indicate the range of the ratio of maternal:paternal reads at a statistical threshold of 95%. Regions where the confidence intervals fell between 0.35-0.65 and spanned 0.5 were determined as bi-allelic binding sites, where CTCF or cohesin binds equally on both alleles.

|       | Called at $p < 0.001$ | Genomewide sig. ( $p < 1e^{-6}$ ) |
|-------|-----------------------|-----------------------------------|
| CTCF  | 116                   | 21                                |
| Rad21 | 38                    | 0                                 |

Table S3: Number of peaks called as mono-allelic, regions are shown at statistically significant threshold of  $p < 0.001$ , and  $p < 1e^{-6}$  (which represents genomewide significance after correction for multiple testing) .

| Gene      | Chromosome | Primer       | Expression in brain | Imprinted Expression | Notes                                                                   |
|-----------|------------|--------------|---------------------|----------------------|-------------------------------------------------------------------------|
| AK040960  | 3          | AK040960_1F  | No                  | n/a                  |                                                                         |
|           |            | AK040960_2R  |                     |                      |                                                                         |
|           |            | AK040960_1F  | No                  | n/a                  |                                                                         |
|           |            | AK040960_4R  |                     |                      |                                                                         |
|           |            | AK040960_2F  | No                  | n/a                  |                                                                         |
|           |            | AK040960_2R  |                     |                      |                                                                         |
| AK045814  | 2          | AK045814_3F  | No                  | n/a                  |                                                                         |
|           |            | AK045814_4R  |                     |                      |                                                                         |
|           |            | AK045814_1F  | Yes                 | No                   |                                                                         |
|           |            | AK045814_3R  |                     |                      |                                                                         |
|           |            | AK045814_3F  | Yes                 | No                   | Transcript size is different between C57BL/6 and <i>Mus m castaneus</i> |
|           |            | AK045814_6R  |                     |                      |                                                                         |
| AK814/295 | 2          | AK814/295_F  | Yes                 | No                   | No expression from the <i>Mus m castaneus</i> allele                    |
|           |            | AK814/295_R  |                     |                      |                                                                         |
|           |            | AK814/295_F2 |                     |                      |                                                                         |
|           |            | AK814/295_R2 | No                  | n/a                  |                                                                         |
|           |            | AK814/295_F  |                     |                      |                                                                         |
|           |            | AK814/295_R  |                     |                      |                                                                         |
| AK046150  | 14         | AK046150_F   | Yes                 | No                   |                                                                         |
|           |            | AK046150_R   |                     |                      |                                                                         |
| AK086749  | 14         | AK086749_1F  | No                  | n/a                  |                                                                         |
|           |            | AK086749_4R  |                     |                      |                                                                         |
|           |            | AK086749_2F  | Yes                 | No                   | No expression from the C57BL/6 allele                                   |
|           |            | AK086749_4R  |                     |                      |                                                                         |
| Entpd4    | 14         | Entpd4_2F    | Yes                 | No                   |                                                                         |
|           |            | Entpd4_3R    |                     |                      |                                                                         |
|           |            | Entpd4_9F    | Yes                 | No                   |                                                                         |
|           |            | Entpd4_12R   |                     |                      |                                                                         |
| Gata5     | 2          | GATA5_4FA    | No                  | n/a                  |                                                                         |
|           |            | GATA5_6RA    |                     |                      |                                                                         |
|           |            | GATA5_3F     | No                  | n/a                  |                                                                         |
|           |            | GATA5_6RB    |                     |                      |                                                                         |
|           |            | GATA5_4FB    | No                  | n/a                  |                                                                         |
|           |            | GATA5_5R     |                     |                      |                                                                         |
| Gnaz      | 10         | GNAZ_3F      | Yes                 | No                   |                                                                         |
|           |            | GNAZ_4R      |                     |                      |                                                                         |
|           |            | GNAZ_F       | Yes                 | No                   |                                                                         |
|           |            | GNAZ_R       |                     |                      |                                                                         |
|           |            | GNAZ_2F      | Yes                 | No                   |                                                                         |
|           |            | GNAZ_3R      |                     |                      |                                                                         |
| Gpld1     | 13         | Gpld2_1F     | Yes                 | No                   |                                                                         |
|           |            | Gpld2_5R     |                     |                      |                                                                         |
|           |            | Gpld2_5F     | Yes                 | No                   |                                                                         |
|           |            | Gpld2_11R    |                     |                      |                                                                         |
| Loxl2     | 14         | Loxl2_1F     | No                  | n/a                  |                                                                         |
|           |            | Loxl2_2R     |                     |                      |                                                                         |
|           |            | Loxl2_1F     | No                  | n/a                  |                                                                         |
|           |            | Loxl2_3R     |                     |                      |                                                                         |
|           |            | Loxl2_1aF    | No                  | n/a                  |                                                                         |
|           |            | Loxl2_2R     |                     |                      |                                                                         |
|           |            | Loxl2_1aF    | No                  | n/a                  |                                                                         |
|           |            | Loxl2_3R     |                     |                      |                                                                         |
| Mrs2      | 13         | Mrs2_2F      | Yes                 | No                   |                                                                         |
|           |            | Mrs2_4R      |                     |                      |                                                                         |
|           |            | Mrs2_5F      | Yes                 | No                   |                                                                         |
|           |            | Mrs2_6R      |                     |                      |                                                                         |
|           |            | Mrs2_2F      | Yes                 | No                   |                                                                         |
|           |            | Mrs2_6R      |                     |                      |                                                                         |
| Rtdr1     | 10         | Rtdr1_4F     | Yes                 | No                   |                                                                         |
|           |            | Rtdr1_6RA    |                     |                      |                                                                         |
|           |            | Rtdr1_5F     | Yes                 | No                   |                                                                         |
|           |            | Rtdr1_6RB    |                     |                      |                                                                         |
|           |            | Rtdr1_6F     | No                  | n/a                  |                                                                         |
|           |            | Rtdr1_7R     |                     |                      |                                                                         |
| Slc44a3   | 3          | Slc44a3_3F   | Yes                 | No                   |                                                                         |
|           |            | Slc44a3_5R   |                     |                      |                                                                         |
| Snca      | 6          | SNCA_A1F     | No                  | n/a                  |                                                                         |
|           |            | SNCA_ST_2R   |                     |                      |                                                                         |
|           |            | SNCA_1F      | Yes                 | No                   | No expression from the C57BL/6 allele                                   |
|           |            | SNCA_ST_2R   |                     |                      |                                                                         |
|           |            | SNCA_1F      | Yes                 | No                   | No expression from the C57BL/6 allele                                   |
|           |            | SNCA_LT_6R   | Yes                 | No                   | No expression from the C57BL/6 allele                                   |
| Tbc1d30   | 10         | SNCA_A1F     | Yes                 | No                   | No expression from the C57BL/6 allele                                   |
|           |            | SNCA_LT_6R   |                     |                      |                                                                         |
|           |            | Tbc1d_2F     | Yes                 | No                   |                                                                         |
|           |            | Tbc1d_5R     |                     |                      |                                                                         |
| Trio      | 15         | Tbc1d_9F     | Yes                 | No                   |                                                                         |
|           |            | Tbc1d_11R    |                     |                      |                                                                         |
|           |            | Trio_F2      | Yes                 | No                   |                                                                         |
|           |            | Trio_R5      |                     |                      |                                                                         |
| Trio      | 15         | Trio_F22     | Yes                 | No                   |                                                                         |
|           |            | Trio_R26     |                     |                      |                                                                         |

Table S4: Allele-specific expression of candidate genes from Table 2. Primer sequences are found in Table S6.

| Somatic & likely somatic DMR, or nearest gene/feature | DMR position (Xie et. al.)    | Known not to be a gDMR | Methylated Allele | CTCF Binding? | Binding Allele | Allele-specific pval  | Cohesin Binding? | Binding Allele | Allele-specific pval  |
|-------------------------------------------------------|-------------------------------|------------------------|-------------------|---------------|----------------|-----------------------|------------------|----------------|-----------------------|
| <b>Bind both CTCF and cohesin</b>                     |                               |                        |                   |               |                |                       |                  |                |                       |
| <i>H19</i> promoter                                   | chr7:149,763,483-149,765,230  | Yes                    | P                 | Yes           | Mat            | 1.11e <sup>-074</sup> | Yes              | Mat            | 1.08e <sup>-004</sup> |
| <i>Cdkn1c</i>                                         | chr7:150,645,240-150,647,381  | Yes                    | P                 | Yes           |                |                       | Yes              |                |                       |
| <i>Gtl2</i>                                           | chr12:110,777,813-110,781,249 | Yes                    | P                 | Yes           | Mat            | 6.10e <sup>-005</sup> | Yes              |                |                       |
| <i>Magel2</i>                                         | chr7:69,521,307-69,522,167    | Yes                    | M                 | Yes           | Pat            | 3.38e <sup>-008</sup> | Yes              | Pat            | 3.00e <sup>-002</sup> |
| <i>Casc1</i> intragenic*                              | chr6:145,136,212-145,136,335  | ND                     | M                 | Yes           |                |                       | Yes              |                |                       |
| <i>Commd1</i> DMR2 (intragenic)*                      | chr11:22,880,151-22,880,300   | ND                     | M                 | Yes           |                |                       | Yes              |                |                       |
| <i>Myo10</i> intragenic*                              | chr15:25,643,579-25,643,918   | ND                     | M                 | Yes           |                |                       | Yes              |                |                       |
| <i>Eif2c2</i> diffuse DMR*                            | chr15:72,927,789-73,009,831   | ND                     | P                 | Yes           |                |                       | Yes              |                |                       |
| <i>Gtl2-Mirg</i> diffuse DMR*                         | chr12:110,783,188-110,989,333 | ND                     | P                 | Yes           | Mat            | 6.10e <sup>-005</sup> | Yes              |                |                       |
| <i>Nhlrc1</i> downstream*                             | chr13:47,106,179-47,106,298   | ND                     | M                 | Yes           |                |                       | Yes              |                |                       |
| <b>Bind CTCF only</b>                                 |                               |                        |                   |               |                |                       |                  |                |                       |
| <i>AK086712</i> promoter*                             | chr7:69,354,141-69,354,450    | ND                     | M                 | Yes           | Pat            | 2.15e <sup>-002</sup> | No               |                |                       |
| <i>Snrpn</i> U exon*                                  | chr7:67,285,188-67,285,250    | ND                     | M                 | Yes           |                |                       | No               |                |                       |
| <i>Neurog3</i> upstream*                              | chr10:61,590,706-61,590,749   | ND                     | M                 | Yes           | Pat            | 2.00e <sup>-002</sup> | No               |                |                       |
| <b>Bind cohesin Only</b>                              |                               |                        |                   |               |                |                       |                  |                |                       |
| <i>Nesp</i>                                           | chr2:174,109,010-174,113,395  | Yes                    | P                 | No            |                |                       | Yes              |                |                       |
| <i>Igf2r</i>                                          | chr17:12,962,643-12,962,696   | Yes                    | P                 | No            |                |                       | Yes              |                |                       |
| <i>H13</i> DMR2 (3' end)                              | chr2:152,533,500-152,533,900  | Yes                    | M                 | No            |                |                       | Yes              |                |                       |
| <i>Pvt1</i> promoter*                                 | chr15:61,868,725-61,868,885   | ND                     | M                 | No            |                |                       | Yes              |                |                       |
| <b>Bind Neither CTCF and cohesin</b>                  |                               |                        |                   |               |                |                       |                  |                |                       |
| <i>Ndn</i>                                            | chr7:69,493,100-69,493,181    | Yes                    | M                 | No            |                |                       | No               |                |                       |
| <i>Mkrn3</i>                                          | chr7:69,564,012-69,565,740    | Yes                    | M                 | No            |                |                       | No               |                |                       |
| <i>Dlk1</i>                                           | chr12:110,697,919-110,700,243 | Yes                    | P                 | No            |                |                       | No               |                |                       |
| <i>Vwde</i> promoter*                                 | chr6:13,174,720-13,174,854    | ND                     | P                 | No            |                |                       | No               |                |                       |
| 6330408a02Rik 3' end*                                 | chr7:13,846,427-13,846,910    | ND                     | M                 | No            |                |                       | No               |                |                       |
| <i>U80893</i> 5' upstream*                            | chr7:68,084,346-68,085,190    | ND                     | M                 | No            |                |                       | No               |                |                       |
| <i>mir344b</i> *                                      | chr7:68,935,151-68,935,803    | ND                     | M                 | No            |                |                       | No               |                |                       |
| <i>mir344c</i> *                                      | chr7:68,982,367-68,982,367    | ND                     | M                 | No            |                |                       | No               |                |                       |
| <i>mir344</i> *                                       | chr7:69,022,442-69,022,857    | ND                     | M                 | No            |                |                       | No               |                |                       |
| <i>mir344-2</i> *                                     | chr7:69,084,650-69,084,878    | ND                     | M                 | No            |                |                       | No               |                |                       |
| <i>mir344g</i> *                                      | chr7:69,125,234-69,126,166    | ND                     | M                 | No            |                |                       | No               |                |                       |
| <i>Magel2-Mrkn3</i> intergenic*                       | chr7:69,551,285-69,552,030    | ND                     | M                 | No            |                |                       | No               |                |                       |
| <i>Grb10</i> DMR2 (intragenic)*                       | chr11:11,935,418-11,935,544   | ND                     | M                 | No            |                |                       | No               |                |                       |
| <i>FR149454</i> promoter*                             | chr11:119,119,717-119,120,635 | ND                     | M                 | No            |                |                       | No               |                |                       |
| <i>FR085584</i> promoter*                             | chr12:81,269,160-81,269,984   | ND                     | M                 | No            |                |                       | No               |                |                       |

Table S5: Comparison of CTCF and cohesin binding at somatic DMRs identified by whole genome bisulphite sequencing (Xie et al, 2012). CTCF & cohesin, CTCF, cohesin and neither. The results for somatic DMRs are in close agreement with the results for gDMRs (Table 1). Allele-specific binding is defines at genomewide significance.

| <b>qPCR primers</b>            | <b>Forward Primer</b>     | <b>Reverse Primer</b>     | <b>FAM Probe</b>         |
|--------------------------------|---------------------------|---------------------------|--------------------------|
| Positive control <i>Rep1+2</i> | TCTTTAGGTTTGGCGCAATCGA    | GACGTCTGCTGAATCAGTTGTG    | TTTGCTGCCACCACGCG        |
| Negative control <i>DMDup</i>  | AGTGGTGTCTGTAATCTGGAGAGAA | TGAGCCTGCATCTTATTGAAGTGAT | CCATGTCCTATATAAGTAACACTC |
| <i>Grb10</i>                   | GCCGGCTAGCACAGACTT        | CGGGAGCTGTCCACTGG         | CCCGGTAGCGCGCACG         |
| <i>Nnat</i>                    | GGACACCATGGGCTTGGT        | GCAGCAAGATGTGAGACTAGATACA | ACCACACGGTGGCACAA        |
| <i>Peg10</i>                   | GCCACTAACCTGTCAGTAAGAATGT | GGAGACCCTTGTGCTTGGA       | CCCGACCCTTTCCCG          |
| <i>Nap115</i>                  | GGGCAAGCTCTCCATAAAGTCTTTT | CGCGACCGGTGACAGT          | CCCCAGGCCCCCGCG          |

  

| <b>Pyrosequencing primers</b> | <b>Forward Primer</b>    | <b>5' Biotin labeled Reverse Primer</b> | <b>Sequencing primer</b> |
|-------------------------------|--------------------------|-----------------------------------------|--------------------------|
| <i>Inpp5f</i> v2              | GCTACCCATGCCAGATTAGAAATT | AATGGCCAAGGATTAAAAGATACA                | CATGCCAGATTAGAAATTAC     |
| <i>Mest</i>                   | AGTATACCCTGGACCGCATTACGT | ATCTTCCCATGTTCCGGGAGT                   | GTCAGCTGGGTGGTC          |
| <i>Peg10</i>                  | CTTCACACGCTACGAAGTATG    | TTAAGCGCTCATTAGTACATCGTA                | GCTTCGCTGTACTAATGG       |

Table S6: qPCR and Pyrosequencing primer sequences.



| Primer name  | Sequence                |
|--------------|-------------------------|
| Rtdr1 4F     | AAGCATGACATCATCCAAGC    |
| Rtdr1 6R     | TGGCCTTCACCTCCTCAT      |
| Rtdr1 5F     | GGAGAAAGCTCCTTAGCCAAA   |
| Rtdr1 6R     | GATAGCATTGGCATCCAGAG    |
| Rtdr1 6F     | GTGTGCAGACACGGATGAGG    |
| Rtdr1 7R     | TCACTTTGATGGCTACTTCTGC  |
| GNAZ 3F      | GCAGCTCTTTGCTCTGACTG    |
| GNAZ 4R      | AAGAGGATGAGCGAGGTGTT    |
| GNAZ F       | CAGTGGCTATGACCTGAAGC    |
| GNAZ R       | CTCGAACTGACGTTGGATGT    |
| GNAZ 2F      | TTCGCAAGCCTTATGAAAAC    |
| GNAZ 3R      | GCTGCCTCTTTTCCTCTG      |
| AK045814 1F  | AGAGCGCTGATGCAGAGTTA    |
| AK045814 3R  | TTCTGTCCATTTACAGCAAG    |
| AK814/295 F  | AACCCGAGTTACCAGCAAAC    |
| AK814/295 R  | TTGTGGACCTCTGACTCTGC    |
| AK045814 3F  | CTGTGGGCTTGAGTCCAGT     |
| AK045814 6R  | AACAGTGTCAAAAGGGACCA    |
| AK814/295 F2 | TCTCTTGGCTGGTGCACCT     |
| AK814/295 R2 | TGAACTCCGGACCTTCAGA     |
| GATA5 4F     | AGAAAAACGGAAGCCAAAGAA   |
| GATA5 6R     | GGCTGCTGACACAGGAACTA    |
| GATA5 3F     | CTGCTCCAACTGCCATACTG    |
| GATA5 6R     | AGGCAAAAGTCTTCAGGTTCG   |
| GATA5 4F     | CACTTTGAAGGCAGAGTCCA    |
| GATA5 5R     | CAGCCTGCTTCTTTCTCCA     |
| Ak046150 F   | TTCTGGCTAGCCTGGTTGT     |
| Ak046150 R   | AGGGCACATTGTCAACATTT    |
| AK086749 1F  | AGCTTCCCTGAACCTGAAGT    |
| AK086749 2F  | ATCCGCAAGACAGACTATGG    |
| AK086749 4R  | AGGCTCTTCTCTTTCTGAGC    |
| Loxl2 1F     | TATAAAAAGCCCCGGGAGA     |
| Loxl2 1aF    | GCTCGGAGCTTTTCTTCTG     |
| Loxl2 2R     | GGCCTCTACATAGCCCACTT    |
| Loxl2 3R     | TCAGTGTGCTTGCACTCAGT    |
| AK040960 1F  | TCTCTGCAGAAACCTTCCAG    |
| AK040960 2R  | CCTACCTGCACAGACAGGAC    |
| AK040960 2F  | AATGGCGACACTCTGTCAA     |
| AK040960 4R  | TGTGCAAATGTCTACTTGAAGG  |
| Slc44a3 3F   | GAAGAACTCCCCAGTGAAG     |
| Slc44a3 5R   | TGAACTCTGAGTGAGTTGAAGGA |
| Mrs2 2F      | ATGCCTCTCAAGCCACTTTA    |
| Mrs2 4R      | ACGTGCTGAAACCTCAAGTC    |
| Mrs2 5F      | TGAAGGCTGTGATAACTCCAG   |
| Mrs2 6R      | TGGAGTAGGACATGCAGCTT    |
| Gpld2 1F     | CTGGCATAGGTGGACAGTTT    |
| Gpld2 5R     | TGGAGTCCAGTGAGTCCTCT    |
| Gpld2 5F     | CTGGGAGAAGGACACAGAGA    |
| Gpld2 11R    | AGCATAAAGCTGGTCAAACG    |
| SNCA 1F      | TGCTTGGATTGGAAGAAGAG    |
| SNCA A1F     | AGAGGCGCTGACAAATCA      |
| SNCA ST 2R   | TCTATGATGCATGCAAGGAC    |
| SNCA LT 6R   | TTCTTAGGCTTCAGGCTCATAG  |
| Entpd4 2F    | TTCTGTCATTGTGGATGACG    |
| Entpd4 3R    | GCCAGGATGCTAATGACAAC    |
| Entpd4 9F    | GCCAGCACAGTTCAGAAAA     |
| Entpd4 12R   | GTCTCTCAAGGGCAGGAAG     |
| Tbe1d 2F     | GGTCAAAATGGTTTTCAGCA    |
| Tbe1d 5R     | GGCCACAGTAGGAACTACAGC   |
| Tbe1d 9F     | GGCAGAGTTGAGGGAAAAGT    |
| Tbe1d 11R    | AGAACTATTTGCCTGCGATG    |
| Trio F2      | GTTTTGCCAATTCTGAAGGA    |
| Trio R5      | TCCAGCTTCAGTTTCCTCAC    |
| Trio F22     | CCTGGGGATTCTTCAGATT     |
| Trio R26     | CAGGTGACGAAGCAGTGTC     |

Table S7: Primer sequences for allele specific expression testing of candidate genes.

## Supplementary Methods 1

### Chromatin immunoprecipitation

Banked P21 mouse brains were homogenized in 1ml of PBS pH8.0 with protease inhibitor (Roche:04693132001). Nuclei were centrifuged at 5000rpm for 5 mins. Subsequently centrifugation was at 5000rpm for 3 mins and resuspension in 1ml. Nuclei were washed 3X, cross-linked in 1ml of 5mM DTBP (Pierce:20665) on ice for 30 mins, washed twice in PBS, once in 0.1M Tris HCl pH8.0, 1.5M NaCl, and twice with PBS. Nuclei were cross-linked in 1% formaldehyde:PBS for 10 mins at 37°C and washed three times in PBS. Nuclei were lysed in 50mM Tris HCl pH8.0, 1% SDS, 10mM EDTA, with 0.1mM PMSF. DNA was quantified using a Nano-drop (Thermo Scientific).

### Chromatin sonication

Chromatin was sonicated using a probe, amplitude 40 using nine 30 sec bursts, with 30 sec rests on ice. 15µl of sample was subjected to reverse crosslinking and electrophoresed on a 1% w/v agarose gel. Reverse cross-linking was achieved by adding 6µl 5M NaCl and 9µl water to the sample and incubating at 100°C for 1 hour followed by 10µg RNAase A and 18µg Proteinase K treatment for 15 mins at RT.

### Agarose bead chromatin immunoprecipitation.

5µg of chromatin was used for each sample plus 80µl ProteinA agarose fast flow beads (Millipore:16156), 1x complete protease inhibitor (Roche:04693132001) and buffer (16.7mM Tris HCl pH 8.0, 165mM NaCl, 20% Triton X-100, 1.2mM EDTA) to 600µl, rotated for two hours at 20rpm at 4°C and beads separated by centrifugation.

8.5µl of CTCF (Millipore:07-729) or IgG (Abcam:ab17890) or 3µl of Rad21 antibody (Abcam:ab992) was added and diluted to 600µl, rotated overnight at 4°C, transferred to Spin X columns (Costar:8160) with 60µl of agarose beads and rotated for 2 hours at 4°C. Beads were washed in 800µl of buffer 1 (20mM Tris HCl pH 8.0, 150mM NaCl, 0.1% SDS, 1% Triton X 100, 2mM EDTA), rotated for 15 mins at 4°C, repeated with buffer 2 (as buffer 1 but 500mM NaCl) and buffer 3 (10mM Tris HCl pH 8.0, 250mM NaCl, 1% Igepal, 5% sodium deoxycholate, 1mM EDTA). Beads were resuspended in 400µl water, 16µl 5M NaCl, incubated at 65°C overnight and purified by phenol:chloroform extraction.

#### Quantitative PCR validation of CTCF and cohesin ChIP-seq

Applied Biosystems Custom TaqMan™ gene expression assays were designed (Supplementary Table S6 lists primers and FAM-conjugated probes) for each region. Positive and negative controls for CTCF and cohesin binding were chosen from the *H19/Igf2* differentially methylated domain region (Bell and Felsenfeld 2000; Hark et al. 2000; Kanduri et al. 2000). The negative control is upstream of the *H19/Igf2* gDMR and does not bind CTCF or cohesin (Stedman et al. 2008). Assays were designed to four other gDMRs, *Grb10*, *Peg10*, *Nap1l5* and *Nnat*. Of the regions we tested by qPCR, *Nnat* (Evans et al. 2005) and *Grb10* (Hikichi et al. 2003) were predicted to bind CTCF. TaqMan™ probes were designed to the centre of the CTCF and cohesin binding peaks except for *Nap1l5*, which did not exhibit enrichment, the probe was designed within the gDMR itself and constituted a negative control. Each region was assayed in duplicate and results were normalized to input and background.

CTCF and cohesin binding was assigned by performing a statistical comparison to the negative control region using a one-tailed Student's t-test. Regions with enrichment greater than the negative control with a  $p < 0.05$  were defined as CTCF or cohesin binding (Supplemental Fig. S8).
